**Acid sphingomyelinase inhibition results in profound rescue  
of neuronal function in glucocerebrosidase deficiency –  
unexpected opposing effects of Parkinson disease risk genes**

Marcus Keatinge<sup>1,2,3\*</sup>, Matthew E. Gegg<sup>4\*</sup>, Lisa Watson<sup>1,2</sup>, Heather Mortiboys<sup>2</sup>, Nan Li<sup>1,2</sup>, Mark Dunning<sup>2</sup>, Deepak Ailani<sup>1,2</sup>, Hai Bul<sup>5</sup>, Astrid van Rens<sup>6</sup>, Dirk J.Lefeber<sup>6,7</sup>, Ryan B. MacDonald<sup>1</sup>, Anthony H.V. Schapira<sup>4</sup>, Oliver Bandmann<sup>1,2</sup>

\*Both authors contributed equally to the manuscript.

<sup>1</sup>Bateson Centre, Firth Court, University of Sheffield, Western Bank Sheffield S10 2TN, UK and <sup>2</sup>Sheffield Institute for Translational Neuroscience (SITraN), University of Sheffield, 385a Glossop Road, Sheffield S10 2HQ, UK; <sup>3</sup>Centre for Discovery Brain Sciences, Chancellor's Building, Edinburgh EH16 4TJ, UK; <sup>4</sup>Department of Clinical and Movement Neurosciences, UCL Queen Square Institute of Neurology, London NW3 2PF, UK; <sup>5</sup>Eli Lilly and Company, Drop Code 1940, Indianapolis, IN 46285 USA; <sup>6</sup>Department of Laboratory Medicine, Translational Metabolic Laboratory, Radboud University Medical Center, Nijmegen, The Netherlands. <sup>7</sup>Department of Neurology, Donders Institute for Brain, Cognition and Behaviour, Radboud University Medical Center, Nijmegen, The Netherlands.

Address corresponding author: Prof Oliver Bandmann MD PhD, Sheffield Institute for Translational Neuroscience, Sheffield Institute for Translational Neuroscience (SITraN), 385a Glossop Road, Sheffield S10 2HQ, UK. Tel: x44-114-2222261; email: [o.bandmann@sheffield.ac.uk](mailto:o.bandmann@sheffield.ac.uk).

**Keywords:**

Parkinson's disease, glucocerebrosidase 1, acid sphingomyelinase, zebrafish, gene-gene interaction.

## **Abstract**

The additive effect of genetic risk variants on overall disease risk is a plausible but frequently unproven hypothesis. Variants in the two lysosomal disease genes *glucocerebrosidase1* (*GBA1*) and *sphingomyelinase* (*SMPD1*) are genetic risk factors for sporadic Parkinson's disease (PD). We investigated the biological effect of combined glucocerebrosidase (GCCase) and acid sphingomyelinase (ASM) deficiency in zebrafish (*Danio rerio*), an ideally suited vertebrate model system to study gene-gene interaction. Combined genetic inactivation of GCCase and ASM resulted in marked synergistic increases of key sphingolipids in the *gba1<sup>-/-</sup>;smpd1<sup>-/-</sup>* double-mutant compared to *gba1<sup>-/-</sup>* or *smpd1<sup>-/-</sup>* single mutant zebrafish. However, the *gba1<sup>-/-</sup>;smpd1<sup>-/-</sup>* double-mutant zebrafish unexpectedly displayed a complete reciprocal rescue of mitochondrial respiratory chain function compared to the *gba1<sup>-/-</sup>* or *smpd1<sup>-/-</sup>* single mutant zebrafish. The mitochondrial rescue effect resulted in abolished lipid membrane peroxidation, normalisation of motor behaviour and prolonged survival in the *gba1<sup>-/-</sup>;smpd1<sup>-/-</sup>* double-mutant zebrafish compared to the *gba1<sup>-/-</sup>* single mutant zebrafish strain. RNAseq-based transcriptomic pathway analysis confirmed a profound rescue of neuronal function and intracellular homeostasis. Complementing *in vitro* experiments in a previously established model of GCCase deficiency in dopaminergic SH-SY5Y cells demonstrated that the observed rescue effect is autophagy-independent. Our study highlights the importance of a functional validation for any putative interactions between PD risk genes and their overall effect on disease-relevant mechanisms rather than readily assuming an additive effect.

## **Introduction**

Monogenically inherited forms of Parkinson's disease (PD) due to mutations in Mendelian PARK genes such as *SNCA*, *LRRK2* or *parkin* can only be detected in 5-10% of PD patients in most populations.<sup>1</sup> Genome-wide association studies (GWAS) have identified > 30 PD risk genes in the much more common sporadic form of PD. However, the effect of each individual risk gene is typically small.<sup>2</sup> A popular but largely unproven hypothesis is an additive effect of risk haplotypes, based on the assumption that the risk of PD correlates with the number of risk variants present in an individual. Biallelic mutations in the *glucocerebrosidase 1 (GBA1)* gene lead to the lysosomal storage disorder Gaucher's disease (GD). Genetic inactivation of *GBA1* results in decreased activity of the lysosomal enzyme glucocerebrosidase (GCCase) which hydrolyses glucosylceramide to ceramide and glucose. Heterozygous *GBA1* mutations are the most common and strongest genetic risk factor for sporadic PD with a prevalence of ~ 5-20%, depending on the population investigated.<sup>3-5</sup> Heterozygote *GBA1* mutation carriers have a 10%-30% risk of developing PD by age 80.<sup>6, 7</sup> Severe *GBA1* mutations confer a considerably higher risk of PD than mild mutations.<sup>8</sup> However, no additional factors other than age or the severity of the *GBA1* mutation have been identified which would explain the highly variable penetrance of PD in *GBA1* mutations carriers. Sequence variants in other lysosomal disease genes (LSD) were subsequently identified as additional and separate risk factors for PD.<sup>9</sup> There is particularly strong evidence for an association with variants in the *SMPD1* gene (encoding for acid sphingomyelinase (ASM)), the causative gene of Niemann-Pick disease A/B.<sup>10</sup>

Zebrafish (*Danio rerio*) are an ideally suited vertebrate model to study gene-gene interactions due to their short generation time, high fecundity and ease of housing. We had previously characterised a *gba1* mutant zebrafish line (*gba1<sup>-/-</sup>*).<sup>11</sup> *gba1<sup>-/-</sup>* zebrafish faithfully modelled key features of GD including mitochondrial dysfunction

and neurodegeneration resulting in abnormal behaviour and shortened survival to 12-14 weeks. As both GCCase and ASM are lysosomal hydrolases linked to sporadic PD, we hypothesised that additional ASM deficiency would further worsen mitochondrial dysfunction, enhance the phenotype and accelerate disease progression in GCCase deficient *gba1*<sup>-/-</sup> zebrafish. Combined GCCase and ASM deficiency indeed acted synergistically on key sphingolipid metabolites in the *gba1*<sup>-/-</sup>; *smpd1*<sup>-/-</sup> double-mutant zebrafish as expected. However, we unexpectedly observed a reciprocal rescue effect of combined GCCase and ASM deficiency on mitochondrial respiratory chain function in the *gba1*<sup>-/-</sup>; *smpd1*<sup>-/-</sup> double-mutant zebrafish. The mitochondrial rescue led to an abrogation of oxidative membrane damage, normalisation of the motor phenotype and markedly prolonged survival in *gba1*<sup>-/-</sup>; *smpd1*<sup>-/-</sup> zebrafish compared to the *gba1*<sup>-/-</sup> (single) mutant zebrafish. Complementary *in vitro* work established that the observed mitochondrial rescue effect is autophagy-independent. Our study highlights the need of functional validation of any PD risk gene interaction in suitable model systems rather than readily assuming an additive effect.

## **Materials and Methods**

### **Zebrafish husbandry**

All larval and adult zebrafish were housed at the University of Sheffield; experimental procedures being in accordance UK Home Office Animals (Scientific Procedures) Act 1986 (Project license PPL 70/8437, held by Dr Oliver Bandmann). Adult zebrafish were housed at a density of 20 per tank, on a cycle of 14 h of light, 10 h of dark. Adults and embryos were kept at constant temperature of 28°C.

### **Mutant line generation and line maintenance**

The *gba1*<sup>-/-</sup> mutant lines was generated using TALEN technology.<sup>11</sup> The *smgd1*<sup>-/-</sup> mutant line was generated by the Crispr/Cas9 method as previously described.<sup>12</sup> The following ultramer template was used: 5'-AAAGCACCGACTCGGTGCCACTTTTTCAAGTTGATAACGGACTAGCCTTATTTTA ACTTGCTATTTCTAGCTCTAAAACGGATTGAGGCTTGTGTCTCcCTATAGTGAGT CGTATTACGC). The *smgd1*<sup>-/-</sup> line was genotyped using primers F 5'-AGCCGTGGTGGTTTCTACAG and R 5'-CCTTCTCTCCCTTGTCTCG. The *smgd1*<sup>-/-</sup> line was crossed to *gba1*<sup>+/-</sup> to generate double heterozygous individuals. These were subsequently in-crossed to generate double mutants. At each in-cross larvae were genotyped at 3dpf by larval tail biopsy as previously described.<sup>13</sup> Each genotyped was raised in genotype-specific tanks at a density of 10-15 fish per tank. All individuals were re-genotyped at 10 weeks post-fertilisation. *smgd1*<sup>+/-</sup> were crossed with *gba1*<sup>+/-</sup> to generate *gba1*<sup>+/-</sup>;*smgd1*<sup>+/-</sup>. These were subsequently in-crossed to generate double mutants, single mutants and WT controls.

### **Biochemical activity assays and mass spectrometry**

Sphingomyelinase activity was determined using homogenates prepared as follows. Tubes containing twenty embryos (5 dpf) were sonicated in 500 µl MilliQ and centrifuged (11000 rpm). ASM activities were measured using 20 µL supernatant and

incubated with substrate HMU-PC (6-hexadecanoylamino-4-methylumbelliferyl-phosphorylcholine 0.66 mM, 20  $\mu$ L, Moscerdam Substrates, NL) at pH 5.2 and 37 °C during 2 hours. Fluorescence intensity was measured at 415 (ex) and 460 (em) nm using a plate reader (LS55, Perkin Elmer). Lysosomal and mitochondrial enzyme assays as well as mass spectrometry were undertaken as previously described.<sup>11</sup>

### **Lipid peroxidation assay**

Mitochondria were isolated from the bodies of 3 month old zebrafish. Bodies were homogenised in ice cold mitochondrial isolation buffer. The Abcam lipid peroxidation kit (ab118970) fluorimetric assay was used to measure lipid peroxidation according to manufacturer's instructions. Results were normalised to WT.

### **Cell culture experiments**

SH-SY5Y cells were cultured in DMEM:F12 (1:1) supplemented with 10% foetal calf serum, 1 mM sodium pyruvate, non-essential amino acids and antibiotics. Cells were passaged and transfected every 72 hours with 12.5 nM SMPD1 ON-TARGETplus SMARTpool siRNA (Dharmacon) using HiPerfect transfection reagent (Qiagen) in the absence or presence of 10  $\mu$ M CBE up to 10 days in culture. Antibodies used were: rabbit LAMP2A antibody (abcam ab125068, 1:1000), mouse  $\alpha$ -synuclein antibody (abcam ab27766, 1:1000), mouse LAMP1 antibody (Novus Biologicals NPB2-25155, 1:8000). Human  $\alpha$ -synuclein in cell culture media was detected using LEGEND MAX ELISA kit (BioLegend). Total cholesterol levels were measured using the Amplex Red Cholesterol Assay Kit (Invitrogen), while the localisation of cholesterol was detected using Filipin III as per manufacturer's instructions (abcam ab 133116). Filipin staining was assessed using a Nikon Eclipse Ti\_E inverted microscope (excitation 340 nm and emission 460 nm; 40X magnification). Images were acquired using a Hamamatsu Orca-Flash camera and NIS Elements AR software.

### **RNA preparation for gene expression analysis**

RNA was prepared from brain tissue of 12 weeks old zebrafish. A Trizol based protocol was used to extract RNA from the tissue. Briefly, individual brains were homogenized in 250  $\mu$ l TRI Reagent (Sigma) and incubated at room temperature before adding 50  $\mu$ l chloroform (Thermo Fisher). The samples were centrifuged at 13,300 x g and the top aqueous phase was collected and transferred to a separate tube. RNA was precipitated from the aqueous phase by mixing with equal volume of isopropanol (Thermo Fisher) and centrifugation at 13,300 x g. Precipitated RNA was resuspended in DEPC-treated water (Thermo Fisher) and its concentration and quality were quantified using the Nanodrop 1000 Spectrophotometer. 750 ng of high quality total RNA, with an RNA integrity number (RIN) of 9 or above, was used in the preparation of sequencing libraries using the NEB Ultra II Directional RNA Library Prep Kit (NEB catalogue number E7760), following the polyA mRNA workflow. Libraries were individually indexed and pooled for sequencing. Single-end 100bp sequencing was performed on the Illumina HiSeq 2500 platform using Rapid Run mode with V2 chemistry.

### **RNA-seq Analysis**

Raw sequencing reads were processed using the bcbio workflow system. The quality of the samples was checked using FastQC and multiqc. The salmon tool (v0.9.01) was used to quantify genes from the zebrafish reference transcriptome (Danio\_rerio.GRCz11.98.gtf from Ensembl.org).<sup>14</sup> The salmon files were then imported into R using the tximport Bioconductor package.<sup>15</sup> Unsupervised clustering and PCA with DESeq2 revealed a batch effect corresponding to sample preparation date.<sup>16</sup> Differential expression was performed using DESeq2 incorporating a batch factor into the model. The contrast tested was between *gba1*<sup>-/-</sup>, double mutants and WT; a positive log fold-change indicating higher expression in GBA single mutants. The clusterProfiler Bioconductor package was used to identify enriched pathways in



up- (adjusted p-value less than 0.05 and log fold-change > 1) and down-regulated genes (adjusted p-value less than 0.05 and log<sub>2</sub> fold-change <-1).<sup>17</sup>

### **Gene set enrichment analysis**

The analysis was performed with Gene Set Enrichment Analysis (GSEA) software version 4.0.3 (<https://www.gsea-msigdb.org/gsea/index.jsp>). GSEA preranked analysis was used with default settings except for “Collapse/Remap to gene symbols” set to “No\_Collapse”. A ranked list used for the analysis was calculated with each gene assigned a score based on the adjusted p value and the log<sub>2</sub> fold change. Zebrafish lysosomal and mitochondrial gene sets were prepared by identifying zebrafish homologues of the genes in human genes sets in Molecular Signatures Database (MSigDB) v7.1.

### **Statistical analysis**

Graphpad prism V.6 software (Graphpad) was used for statistical analysis and all error bars shown denote the mean ± SD of the mean. All experiments were performed in biological triplicate unless otherwise stated. All data were analysed with either T test, two-way ANOVA. Significance in all enzyme activity assays was determined by two way ANOVA with Tukey’s multiple comparison test.

## **Results**

### ***smpd1*<sup>-/-</sup> zebrafish display abolished acid sphingomyelinase activity and marked sphingolipid accumulation**

As mentioned above, we had previously characterised a *gba1*<sup>-/-</sup> zebrafish line<sup>11</sup> and have already demonstrated its usefulness to study gene-gene interactions.<sup>18</sup> *gba1*<sup>-/-</sup> zebrafish faithfully model key features of GCCase deficiency, including Gaucher cell accumulation, marked microglial infiltration, mitochondrial dysfunction and neurodegeneration.<sup>11</sup> *gba1*<sup>-/-</sup> larvae develop normally but *gba1*<sup>-/-</sup> juvenile zebrafish then rapidly deteriorate from 10-12 weeks onwards and die or must be culled for animal welfare reasons at 12-14 weeks. The comparatively late onset of phenotypic abnormalities in the *gba1*<sup>-/-</sup> zebrafish line made it necessary to make a *smpd* stable mutant line rather than using transient gene knockdown techniques such as morpholino injections to study an interaction between GCCase deficiency and ASM deficiency. We identified a single *smpd1* orthologue in zebrafish (ENSDARG00000076121) with 59% shared identity to the human *SMPD1* gene at both the DNA and the protein level. CRISPR/Cas9 technology was used to generate a *smpd1* stable mutant line (*smpd1*<sup>-/-</sup>). The selected mutant allele contained a 5bp deletion and 136bp insertion within exon 3, resulting in a frame-shift and the generation of a premature stop codon (Figure 1A and Supplemental Figure S1). Enzymatic activity of ASM in *smpd1*<sup>-/-</sup> at 5 dpf was reduced by 93% (p=0.006, Figure 1B). The large reduction in ASM enzymatic activity resulted in a significant increase of key glycolipid substrates in the *smpd1*<sup>-/-</sup> larvae already at 5 dpf (Figure 1C).

## **Combined ASM and GCCase deficiency synergistically increases sphingolipid metabolites**

We had previously reported marked sphingolipid accumulation in *gba1<sup>-/-</sup>* zebrafish.<sup>11</sup> We hypothesised that combined (enzymatic) GCCase and ASM deficiency would synergistically increase distinct sphingolipid subtypes. Using mass spectrometry, a comprehensive panel of glycolipid substrates was analysed in the brains of *gba<sup>-/-</sup>* and *smpd1<sup>-/-</sup>* single mutant as well as in *gba<sup>-/-</sup>;smpd1<sup>-/-</sup>* double mutant zebrafish and WT controls at 12 weeks of age. A marked additive effect of combined GCCase and ASM deficiency was observed for Glucosylceramide levels (the direct substrate of GCCase) (Figure 2A). Combined GCCase and ASM deficiency also resulted in an additive effect on lactosylceramide, ceramide and sphinganine levels (Figure 2B-D). Sphingosine levels were increased in *gba<sup>-/-</sup>;smpd1<sup>-/-</sup>* compared to WT, reflecting an increase compared to *gba1<sup>-/-</sup>* but not compared to *smpd1<sup>-/-</sup>* (Figure 2E). Unexpectedly, there was no synergistic effect in sphingomyelin levels in the *gba<sup>-/-</sup>;smpd1<sup>-/-</sup>* double mutants (Figure 2F).

Chitotriosidase and  $\beta$ -Hexosaminidase are markedly increased in the serum of GD patients and used as biomarkers to monitor disease activity.<sup>19</sup> We previously observed a marked increase in chitotriosidase and  $\beta$ -hexosaminidase activity in *gba1<sup>-/-</sup>* zebrafish brain tissue at 12 weeks.<sup>11</sup> As key GCCase substrates were synergistically increased in *gba<sup>-/-</sup>;smpd1<sup>-/-</sup>* double mutant zebrafish, we investigated whether combined GCCase and ASM inactivation may also result in a further increase chitotriosidase and  $\beta$ -hexosaminidase activity. Unexpectedly, *gba<sup>-/-</sup>;smpd1<sup>-/-</sup>* double mutant zebrafish displayed a similar increase in chitotriosidase and  $\beta$ -hexosaminidase activity compared to *gba1<sup>-/-</sup>* (Supplemental Figure 2).

### **Reciprocal rescue effect of combined GCase and ASM deficiency on mitochondrial respiratory chain function**

Mitochondrial function is markedly impaired in GCase deficiency and other lysosomal storage disorders.<sup>20; 21</sup> We had previously observed a marked reduction of mitochondrial respiratory chain Complex IV activity and, to a lesser extent, also of Complex III in *gba1<sup>-/-</sup>*.<sup>11</sup> We now investigated whether the marked synergistic effect of combined deficiency of GCase and acid sphingomyelinase activity on key sphingolipids in the *gba<sup>-/-</sup>;smpd1<sup>-/-</sup>* double mutant zebrafish resulted in a further worsening of mitochondrial respiratory chain function. However, unexpectedly, we observed a marked reciprocal rescue effect. Complex I activity was reduced by 65% in *smpd1<sup>-/-</sup>* compared to WT levels ( $p=0.0198$ , Figure 3A) but restored to 92% of WT levels in *gba1<sup>-/-</sup>;smpd1<sup>-/-</sup>* ( $p=0.0445$ , Figure 3A). Complex II was not significantly altered in any of the genotypes (Fig. 3B). Complex III activity in *gba1<sup>-/-</sup>* was reduced by 45% compared to WT levels ( $p=0.0091$ , Figure 3C) as previously observed.<sup>11</sup> In contrast, Complex III activity in the *gba1<sup>-/-</sup>;smpd1<sup>-/-</sup>* double mutant zebrafish was reduced by only 9% compared to WT levels and thus considerably less pronounced than the reduction observed in the *gba1<sup>-/-</sup>*, suggesting a rescue effect in *gba1<sup>-/-</sup>;smpd1<sup>-/-</sup>*. However, this 36% increase in complex III activity in *gba1<sup>-/-</sup>;smpd1<sup>-/-</sup>* compared to *gba1<sup>-/-</sup>* did not reach statistical significance. Complex IV activity was unchanged in *smpd1<sup>-/-</sup>* compared to WT, but reduced by 40% in *gba1<sup>-/-</sup>* compared to WT as previously reported ( $p=0.0491$ , Figure 3D). Remarkably, there was a marked improvement of complex IV activity in *gba1<sup>-/-</sup>;smpd1<sup>-/-</sup>* with an increase in activity of 69% compared to *gba1<sup>-/-</sup>* ( $p=0.0005$ , Figure 3D).

We next determined whether the observed mitochondrial rescue effect had any functional consequences at the cellular level, on behaviour and on survival. Malfunction of the mitochondrial respiratory chain can result in oxidative stress and subsequent lipid peroxidation. We therefore investigated next whether the observed

rescue in mitochondrial function results in reduced oxidative stress-related damage. Lipid peroxidation was increased in *gba1<sup>-/-</sup>* brains by 63% above WT levels ( $p=0.0214$ , Figure 3E). As predicted, lipid peroxidation levels were reduced by 70% in *gba1<sup>-/-</sup>;smpd1<sup>-/-</sup>* double mutants compared to *gba1<sup>-/-</sup>* and thus effectively normalized ( $p=0.0094$ , Figure 3E). We finally assessed whether the normalized mitochondrial function and abolished lipid oxidation in *gba1<sup>-/-</sup>;smpd1<sup>-/-</sup>* results in improved behaviour and prolonged survival. End stage *gba1<sup>-/-</sup>* mutants exhibit very robust behavioural phenotypes with barrel rolling like behaviour.<sup>11</sup> Genetic inactivation of ASM led to a complete rescue of this behaviour in the *gba<sup>-/-</sup>;smpd1<sup>-/-</sup>* double mutant zebrafish (Supplemental Video S1 (WT), S2 (*smpd1<sup>-/-</sup>*), S3 (*gba1<sup>-/-</sup>*) and S4 (*gba<sup>-/-</sup>;smpd1<sup>-/-</sup>*)). Importantly, lifespan was also markedly increased by 23 days (22%) in *gba1<sup>-/-</sup>;smpd1<sup>-/-</sup>* double mutant zebrafish compared to *gba1<sup>-/-</sup>* (median survival of 102 dpf in *gba1<sup>-/-</sup>* and 125dpf in *gba1<sup>-/-</sup>;smpd1<sup>-/-</sup>*,  $p=0.0055$ , Figure 3F).

### ***Key dysregulated pathways in gba1<sup>-/-</sup> are rescued by ASM deficiency***

We next applied RNAseq-based pathway analysis to further elucidate the underlying mechanisms of the observed rescue and learn whether the rescue effect of ASM deficiency was limited to the normalisation of the mitochondrial respiratory chain function or had a more general effect on neuronal health. The differential gene expression analysis identified a total of 512 genes which were dysregulated in *gba<sup>-/-</sup>* but rescued in *gba1<sup>-/-</sup>;smpd1<sup>-/-</sup>*. Amongst these, there are a downregulation of 219 genes and an upregulation of 293 genes in *gba<sup>-/-</sup>* compared to wild-type and *gba1<sup>-/-</sup>;smpd1<sup>-/-</sup>* (adjusted  $p$ -value  $\leq 0.05$ ,  $|\log_2\text{Fold change}| \geq 1$ ). The five most up- or down-regulated genes are listed in Supplementary Table 1 and Table 2. We next employed ClusterProfiler analysis on gene ontology (GO) categories to identify functionally relevant pathways within the rescued gene sets. Key neuronal pathways including the GO terms for synaptic signaling, chemical synaptic transmission and calcium ion regulated exocytosis were markedly downregulated in *gba<sup>-/-</sup>* but normalized in

*gba1<sup>-/-</sup>;smpd1<sup>-/-</sup>* (Figure 5). This suggests that key aspects of neuronal function were restored in the *gba1<sup>-/-</sup>;smpd1<sup>-/-</sup>* double mutants.

We also observed an enrichment of upregulated genes in *gba1<sup>-/-</sup>* compared to *gba1<sup>-/-</sup>;smpd1<sup>-/-</sup>* in a broad range of GO terms, the top 5 of which thought to regulate muscle function. However, since our RNA-seq analysis was carried out on brain tissue, we consider these changes to be of limited relevance only (Suppl Figure 3).

As both GCase and ASM are lysosomal hydrolases, we also specifically focused on the effect of isolated GCase deficiency in *gba1<sup>-/-</sup>* compared to combined GCase and ASM deficiency in *gba1<sup>-/-</sup>;smpd1<sup>-/-</sup>* on lysosome transcriptomic pathways. Gene set enrichment analysis led to the identification of 27 leading-edge, dysregulated lysosomal genes, which account for the pathway's enrichment signal. The expression of these 27 lysosomal genes was increased in *gba1<sup>-/-</sup>* compared to wild-type and *gba1<sup>-/-</sup>;smpd1<sup>-/-</sup>* (Figure 6A, Supplementary Table 3). Amongst these 27 genes, acid hydrolases contributed the most. Cathepsin L, involved in the initiation of protein degradation, ranked as the top rescued gene.

Since we observed a reciprocal rescue effect of combined GCase and ASM deficiency on mitochondrial respiratory chain function in the *gba1<sup>-/-</sup>;smpd1<sup>-/-</sup>* double-mutant zebrafish, we also particularly investigated the transcription of mitochondrial genes involved in the oxidative phosphorylation pathway. Interestingly, gene set enrichment analysis showed an upregulation of oxidative phosphorylation in *gba1<sup>-/-</sup>* compare to wild-type and *gba1<sup>-/-</sup>;smpd1<sup>-/-</sup>* (Figure 6B). The leading-edge gene subset includes 16 genes encoding the subunits of the Complex I, II, IV and V in mitochondrial electron transport chain (Supplementary Table 4). Thus, the observed rescue effect of ASM deficiency on mitochondrial dysfunction in GCase deficiency cannot be explained by a compensatory upregulation of lysosomal or mitochondrial

genes. The normalization of both the upregulated lysosomal and mitochondrial pathways in *gba1<sup>-/-</sup>;smpd1<sup>-/-</sup>* compared to *gba1<sup>-/-</sup>* reflects the profound normalization of intracellular homeostasis in the double-mutant zebrafish.

### **The observed mitochondrial rescue effect is autophagy independent**

Inhibition of ASM is known to promote autophagy.<sup>22</sup> We (MG, AS) and others had previously observed impaired autophagy/mitophagy in GCCase deficiency.<sup>23-25</sup> We therefore investigated in our previously established human dopaminergic SH-SY5Y GCCase-deficient *in vitro* model whether ASM deficiency may exert its observed rescue effect on mitochondrial dysfunction in GCCase deficiency by enhancing autophagy/mitophagy. A siRNA-approach was applied to inactivate *SMPD1*/ASM, GCCase was inhibited with conduritol B-epoxide (CBE) for 10 days.<sup>25</sup> *SMPD1* mRNA levels in the absence or presence of CBE were significantly decreased relative to scrambled (scram) control treated cells ( $p = 0.0003$  and  $0.0007$ , Figure 7A). Treatment with CBE alone or in the presence of *SMPD1* siRNA significantly decreased GCCase activity (79% and 76% reduction, respectively;  $p < 0.01$ ) relative to scram treated cells.<sup>25</sup> Notably GCCase activity was significantly increased in *SMPD1* knock down cells, compared to scram ( $p < 0.05$ , Figure 7B). Macroautophagy flux was measured by quantifying the levels of LC3-II by western blot, a marker for autophagosome number. Under basal conditions, LC3-II levels were similar in all groups. As expected treatment with bafilomycin A1, which prevents the fusion of lysosomes with autophagosomes, caused an accumulation of autophagosomes, and was similar in all groups (Figure 4F-G). These data suggest that there is neither an impairment nor increase in macroautophagy flux under any conditions. Given the effect of (isolated) GCCase or ASM deficiency on  $\alpha$ -synuclein in PD,<sup>10; 26</sup> we also wanted to investigate the effect of combined GCCase and ASM deficiency on  $\alpha$ -synuclein homeostasis. Unexpectedly, the levels of  $\alpha$ -synuclein were significantly decreased (rather than increased as predicted) in *SMPD1*-KD + CBE-treated cells

( $p=0.0139$ , Figures 7C and D), when compared to CBE-treated cells. The decrease in intracellular  $\alpha$ -synuclein levels in *SMPD1-KD+CBE* was not due to increased release of  $\alpha$ -synuclein in to the media (Figure 7E) or becoming insoluble (data not shown).



## **Discussion**

Both *GBA1* and *SMPD1* variants are firmly established inherited risk factors for PD. Additional lysosomal storage disease (LSD) genes such as *CTSD*, *SLC17A5* and *ASAH1* have also been implicated.<sup>9; 27</sup> Biochemically, GCCase and acid sphingomyelinase both play a key role in sphingolipid metabolism.<sup>28</sup> We therefore hypothesized that ASM deficiency would further enhance the phenotype and accelerate disease progression in GCCase-deficient zebrafish. However, unexpectedly, we observed a rescue of the “barrel-rolling” phenotype and a marked prolongation of life expectancy despite clear evidence of an additive effect on the level of the key sphingolipids and their metabolites. The remarkable rescue effect of mitochondrial function in *gba1<sup>-/-</sup>;smpd1<sup>-/-</sup>* on behaviour and survival suggests a central role of mitochondrial dysfunction in GCCase deficiency. The observation of normalised mitochondrial respiratory chain function and amelioration of lipid peroxidation in *gba<sup>-/-</sup>;smpd1<sup>-/-</sup>* would be in keeping with the well-established autophagy-enhancing effect of acid sphingomyelinase inhibition.<sup>22; 29; 30</sup> The profound normalisation of neuronal function in *gba1<sup>-/-</sup>;smpd1<sup>-/-</sup>*, as indicated in our RNA-seq based pathway analysis, is in keeping with the observation of the rescued motor phenotype and further confirms that the observed rescue effect reached beyond an isolated improvement of mitochondrial respiratory chain function. The remarkable normalisation of intracellular homeostasis is also reflected by the normalisation of both lysosomal and mitochondrial transcriptional pathways.

Partial ASM inhibition restored autophagic dysfunction in AD patient-derived neurons as well as ameliorating the autophagic defect in in AD mice, resulting in a reduction of amyloid-beta deposition and improved memory impairment.<sup>31</sup> However, in our human dopaminergic cell culture models, macroautophagy flux appeared unaffected in either ASM deficiency alone, or in cells with both decreased ASM and GCCase. It should be noted that we had previously observed > 95% GCCase inhibition after

treatment with 10  $\mu$ M CBE,<sup>25</sup> whereas GCCase activity was reduced to ~ 80% only in the presence of the transfection reagent required for the knockdown of ASM in this study. This likely explains why the trend for increased  $\alpha$ -synuclein levels in the CBE-only treatment arm was not statistically significant but is still comparable to previous results from CBE-mediated GCCase inhibition in SH-SY5Y cells<sup>25</sup> and mouse brain.<sup>32</sup> The remarkable decrease in soluble monomeric  $\alpha$ -synuclein in cells with combined ASM and GCCase deficiency may reflect a link between tightly controlled sphingolipid metabolism and  $\alpha$ -synuclein homeostasis. However, the zebrafish genome does not contain an orthologue of  $\alpha$ -synuclein. Thus, the observed partial rescue effect of ASM deficiency in our GCCase deficient zebrafish model cannot be due to modulation of  $\alpha$ -synuclein levels in *gba*<sup>-/-</sup>;*smpd1*<sup>-/-</sup>. Given both enzymes are involved in sphingolipid metabolism, it is probable that changes in the glycosphingolipid profile of the cell contribute to the changes observed. Previous reports have also demonstrated that modulation of the glycosphingolipid profile in GCCase deficient cells, other than restoration of GCCase activity, can improve  $\alpha$ -synuclein homeostasis.<sup>33; 34</sup>

Although unexpected, we are not the first to report a rescue effect of double knockout of lysosomal hydrolases or their paralogues. *GBA2* inactivation had a marked rescue effect on the phenotype typically observed in conditional *GBA1* knockout mouse models, whilst simultaneous knock out of galactosylceramidase and beta galactosidase dramatically extended lifespan of galactosylceramidase knockout mice.<sup>35; 36</sup> Zebrafish are ideally suited to study gene-gene interactions in a vertebrate model system of human disease.<sup>18; 37-39</sup> Future studies are needed to determine the functional interaction of other PD risk genes, especially those acting in shared pathways such as LSD genes.

## **Supplemental data**

Supplemental data can be found online at ...

**Acknowledgements:**

This work was supported by funding from Parkinson's UK (G1404 and G1704), the Medical Research Council (MRC, MR/R011354/1 and MR/M006646/1). This research was also supported by the NIHR Sheffield Biomedical Research Centre (BRC).

**Declaration of interests:**

The authors declare no competing interests.

## References:

1. Gasser, T. (2015). Usefulness of Genetic Testing in PD and PD Trials: A Balanced Review. *Journal of Parkinson's disease* 5, 209-215.
2. Chang, D., Nalls, M.A., Hallgrimsdottir, I.B., Hunkapiller, J., van der Brug, M., Cai, F., International Parkinson's Disease Genomics, C., and Me Research, T., Kerchner, G.A., Ayalon, G., et al. (2017). A meta-analysis of genome-wide association studies identifies 17 new Parkinson's disease risk loci. *Nat Genet* 49, 1511-1516.
3. Neumann, J., Bras, J., Deas, E., O'Sullivan, S.S., Parkkinen, L., Lachmann, R.H., Li, A., Holton, J., Guerreiro, R., Paudel, R., et al. (2009). Glucocerebrosidase mutations in clinical and pathologically proven Parkinson's disease. *Brain* 132, 1783-1794.
4. Sidransky, E., Nalls, M.A., Aasly, J.O., Aharon-Peretz, J., Annesi, G., Barbosa, E.R., Bar-Shira, A., Berg, D., Bras, J., Brice, A., et al. (2009). Multicenter analysis of glucocerebrosidase mutations in Parkinson's disease. *N Engl J Med* 361, 1651-1661.
5. Siebert, M., Sidransky, E., and Westbroek, W. (2014). Glucocerebrosidase is shaking up the synucleinopathies. *Brain* 137, 1304-1322.
6. Anheim, M., Elbaz, A., Lesage, S., Durr, A., Condroyer, C., Viallet, F., Pollak, P., Bonaiti, B., Bonaiti-Pellie, C., Brice, A., et al. (2012). Penetrance of Parkinson disease in glucocerebrosidase gene mutation carriers. *Neurology* 78, 417-420.
7. O'Regan, G., deSouza, R.M., Balestrino, R., and Schapira, A.H. (2017). Glucocerebrosidase Mutations in Parkinson Disease. *Journal of Parkinson's disease* 7, 411-422.
8. Gan-Or, Z., Amshalom, I., Kilarski, L.L., Bar-Shira, A., Gana-Weisz, M., Mirelman, A., Marder, K., Bressman, S., Giladi, N., and Orr-Urtreger, A. (2015).

Differential effects of severe vs mild GBA mutations on Parkinson disease.

Neurology 84, 880-887.

9. Robak, L.A., Jansen, I.E., van Rooij, J., Uitterlinden, A.G., Kraaij, R., Jankovic, J., International Parkinson's Disease Genomics, C., Heutink, P., and Shulman, J.M. (2017). Excessive burden of lysosomal storage disorder gene variants in Parkinson's disease. *Brain* 140, 3191-3203.
10. Alcalay, R.N., Mallett, V., Vanderperre, B., Tavassoly, O., Dauvilliers, Y., Wu, R.Y.J., Ruskey, J.A., Leblond, C.S., Ambalavanan, A., Laurent, S.B., et al. (2019). SMPD1 mutations, activity, and alpha-synuclein accumulation in Parkinson's disease. *Mov Disord* 34, 526-535.
11. Keatinge, M., Bui, H., Menke, A., Chen, Y.C., Sokol, A.M., Bai, Q., Ellett, F., Da Costa, M., Burke, D., Gegg, M., et al. (2015). Glucocerebrosidase 1 deficient Danio rerio mirror key pathological aspects of human Gaucher disease and provide evidence of early microglial activation preceding alpha-synuclein-independent neuronal cell death. *Hum Mol Genet* 24, 6640-6652.
12. Hruscha, A., Krawitz, P., Rechenberg, A., Heinrich, V., Hecht, J., Haass, C., and Schmid, B. (2013). Efficient CRISPR/Cas9 genome editing with low off-target effects in zebrafish. *Development* 140, 4982-4987.
13. Wilkinson, R.N., Elworthy, S., Ingham, P.W., and van Eeden, F.J. (2013). A method for high-throughput PCR-based genotyping of larval zebrafish tail biopsies. *BioTechniques* 55, 314-316.
14. Patro, R., Duggal, G., Love, M.I., Irizarry, R.A., and Kingsford, C. (2017). Salmon provides fast and bias-aware quantification of transcript expression. *Nat Methods* 14, 417-419.
15. Sonesson, C., Love, M.I., and Robinson, M.D. (2015). Differential analyses for RNA-seq: transcript-level estimates improve gene-level inferences. *F1000Res* 4, 1521.

16. Love, M.I., Huber, W., and Anders, S. (2014). Moderated estimation of fold change and dispersion for RNA-seq data with DESeq2. *Genome Biol* 15, 550.
17. Yu, G., Wang, L.G., Han, Y., and He, Q.Y. (2012). clusterProfiler: an R package for comparing biological themes among gene clusters. *OMICS* 16, 284-287.
18. Watson, L., Keatinge, M., Gegg, M., Bai, Q., Sandulescu, C., Vardi, A., Futerman, A.H., Schapira, A.H.V., Burton, E.A., and Bandmann, O. (2019). Ablation of the pro-inflammatory master regulator miR-155 does not mitigate neuroinflammation or neurodegeneration in a vertebrate model of Gaucher's disease. *Neurobiol Dis*.
19. Grabowski, G.A. (2012). Gaucher disease and other storage disorders. *Hematology / the Education Program of the American Society of Hematology American Society of Hematology Education Program 2012*, 13-18.
20. Gegg, M.E., and Schapira, A.H. (2016). Mitochondrial dysfunction associated with glucocerebrosidase deficiency. *Neurobiol Dis* 90, 43-50.
21. McKenna, M.C., Schuck, P.F., and Ferreira, G.C. (2019). Fundamentals of CNS energy metabolism and alterations in lysosomal storage diseases. *J Neurochem* 148, 590-599.
22. Perrotta, C., Cervia, D., De Palma, C., Assi, E., Pellegrino, P., Bassi, M.T., and Clementi, E. (2015). The emerging role of acid sphingomyelinase in autophagy. *Apoptosis* 20, 635-644.
23. Li, H., Ham, A., Ma, T.C., Kuo, S.H., Kanter, E., Kim, D., Ko, H.S., Quan, Y., Sardi, S.P., Li, A., et al. (2019). Mitochondrial dysfunction and mitophagy defect triggered by heterozygous GBA mutations. *Autophagy* 15, 113-130.
24. Osellame, L.D., Rahim, A.A., Hargreaves, I.P., Gegg, M.E., Richard-Londt, A., Brandner, S., Waddington, S.N., Schapira, A.H., and Duchon, M.R. (2013). Mitochondria and quality control defects in a mouse model of Gaucher disease--links to Parkinson's disease. *Cell Metab* 17, 941-953.

25. Magalhaes, J., Gegg, M.E., Migdalska-Richards, A., Doherty, M.K., Whitfield, P.D., and Schapira, A.H. (2016). Autophagic lysosome reformation dysfunction in glucocerebrosidase deficient cells: relevance to Parkinson disease. *Hum Mol Genet* 25, 3432-3445.
26. Mazzulli, J.R., Xu, Y.H., Sun, Y., Knight, A.L., McLean, P.J., Caldwell, G.A., Sidransky, E., Grabowski, G.A., and Krainc, D. (2011). Gaucher disease glucocerebrosidase and alpha-synuclein form a bidirectional pathogenic loop in synucleinopathies. *Cell* 146, 37-52.
27. Ysselstein, D., Shulman, J.M., and Krainc, D. (2019). Emerging links between pediatric lysosomal storage diseases and adult parkinsonism. *Mov Disord*, 34:614-624.
28. Lin, G., Wang, L., Marcogliese, P.C., and Bellen, H.J. (2019). Sphingolipids in the Pathogenesis of Parkinson's Disease and Parkinsonism. *Trends Endocrinol Metab* 30, 106-117.
29. Cervia, D., Assi, E., De Palma, C., Giovarelli, M., Bizzozero, L., Pambianco, S., Di Renzo, I., Zecchini, S., Moscheni, C., Vantaggiato, C., et al. (2016). Essential role for acid sphingomyelinase-inhibited autophagy in melanoma response to cisplatin. *Oncotarget* 7, 24995-25009.
30. Justice, M.J., Bronova, I., Schweitzer, K.S., Poirier, C., Blum, J.S., Berdyshev, E.V., and Petrache, I. (2018). Inhibition of acid sphingomyelinase disrupts LYNUS signaling and triggers autophagy. *J Lipid Res* 59, 596-606.
31. Lee, J.K., Jin, H.K., Park, M.H., Kim, B.R., Lee, P.H., Nakauchi, H., Carter, J.E., He, X., Schuchman, E.H., and Bae, J.S. (2014). Acid sphingomyelinase modulates the autophagic process by controlling lysosomal biogenesis in Alzheimer's disease. *J Exp Med* 211, 1551-1570.
32. Rocha, E.M., Smith, G.A., Park, E., Cao, H., Graham, A.R., Brown, E., McLean, J.R., Hayes, M.A., Beagan, J., Izen, S.C., et al. (2015). Sustained Systemic Glucocerebrosidase Inhibition Induces Brain alpha-Synuclein Aggregation,



- Microglia and Complement C1q Activation in Mice. *Antioxid Redox Signal* 23, 550-564.
33. Kim, M.J., Jeon, S., Burbulla, L.F., and Krainc, D. (2018). Acid ceramidase inhibition ameliorates alpha-synuclein accumulation upon loss of GBA1 function. *Hum Mol Genet* 27, 1972-1988.
34. Sardi, S.P., Viel, C., Clarke, J., Treleaven, C.M., Richards, A.M., Park, H., Olszewski, M.A., Dodge, J.C., Marshall, J., Makino, E., et al. (2017). Glucosylceramide synthase inhibition alleviates aberrations in synucleinopathy models. *Proc Natl Acad Sci U S A* 114, 2699-2704.
35. Mistry, P.K., Liu, J., Sun, L., Chuang, W.L., Yuen, T., Yang, R., Lu, P., Zhang, K., Li, J., Keutzer, J., et al. (2014). Glucocerebrosidase 2 gene deletion rescues type 1 Gaucher disease. *Proc Natl Acad Sci U S A* 111, 4934-4939.
36. Tohyama, J., Vanier, M.T., Suzuki, K., Ezo, T., Matsuda, J., and Suzuki, K. (2000). Paradoxical influence of acid beta-galactosidase gene dosage on phenotype of the twitcher mouse (genetic galactosylceramidase deficiency). *Hum Mol Genet* 9, 1699-1707.
37. Austin-Tse, C., Halbritter, J., Zariwala, M.A., Gilberti, R.M., Gee, H.Y., Hellman, N., Pathak, N., Liu, Y., Panizzi, J.R., Patel-King, R.S., et al. (2013). Zebrafish Ciliopathy Screen Plus Human Mutational Analysis Identifies C21orf59 and CCDC65 Defects as Causing Primary Ciliary Dyskinesia. *Am J Hum Genet* 93, 672-686.
38. Ding, Y., Long, P.A., Bos, J.M., Shih, Y.H., Ma, X., Sundsbak, R.S., Chen, J., Jiang, Y., Zhao, L., Hu, X., et al. (2016). A modifier screen identifies DNAJB6 as a cardiomyopathy susceptibility gene. *JCI Insight* 1, pii: e88797.
39. Hosseinbarkooie, S., Peters, M., Torres-Benito, L., Rastetter, R.H., Hupperich, K., Hoffmann, A., Mendoza-Ferreira, N., Kaczmarek, A., Janzen, E., Milbradt, J., et al. (2016). The Power of Human Protective Modifiers: PLS3 and

CORO1C Unravel Impaired Endocytosis in Spinal Muscular Atrophy and  
Rescue SMA Phenotype. *Am J Hum Genet* 99, 647-665.

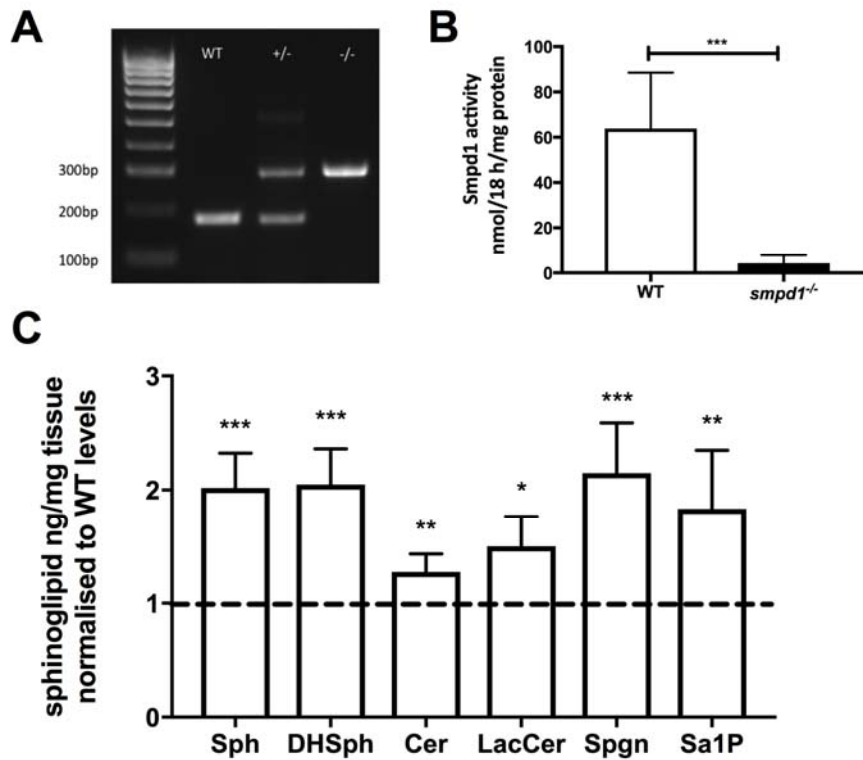

**Figure 1: Genetic and biochemical characterisation of the *smpd1*<sup>+/-</sup> mutant zebrafish line**

(A) Representative genotyping gel of the *smpd1*<sup>-/-</sup> alleles (5bp del and 136bp insertion) demonstrating WT, *smpd1*<sup>+/-</sup> and *smpd1*<sup>-/-</sup>.

(B) Acid sphingomyelinase (ASM) enzymatic activity compared to WT controls, n=6 larvae at 5 dpf per genotype, p=0.006 by Welch's t-test.

(C) Quantification of sphingolipid metabolites, namely Sphingomyelin (Sph), dihydro-sphingomyelin (DHSph), ceramide (Cer), lactosylceramide (LacCer) and Sphinganine 1 phosphate (Sa1P). All metabolites shown are the C18 neuronal species. Data represented are the mean  $\pm$ SD. \*\*\*p<0.001, \*\*p<0.01 and \*p<0.05 by two-tailed t-test.

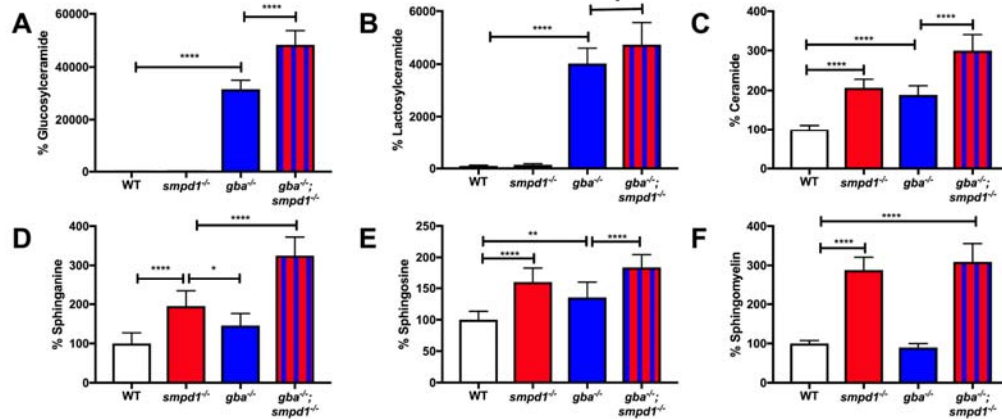

**Fig. 2. Accumulation of key glycolipids across *gba1*<sup>-/-</sup>; *smpd1*<sup>-/-</sup> single mutant and *gba1*<sup>-/-</sup>; *smpd1*<sup>-/-</sup> double mutant genotypes**

(A) Glucosylceramide, (B) Lactosylceramide, (C) Ceramide (D), Sphinganine, (E) Sphingosine and (F) Sphingomyelin levels in WT, single mutant *gba1*<sup>-/-</sup> vs *smpd1*<sup>-/-</sup> zebrafish and *gba1*<sup>-/-</sup>; *smpd1*<sup>-/-</sup> double mutant zebrafish. n=10 of 12 week old zebrafish brains used per group. Data represented are the mean  $\pm$ SD. \*\*\*\*p<0.0001, \*\*\*p<0.001, \*\*p<0.01 and \*p<0.05 by 2 way Anova test with Tukey's multiple comparison.

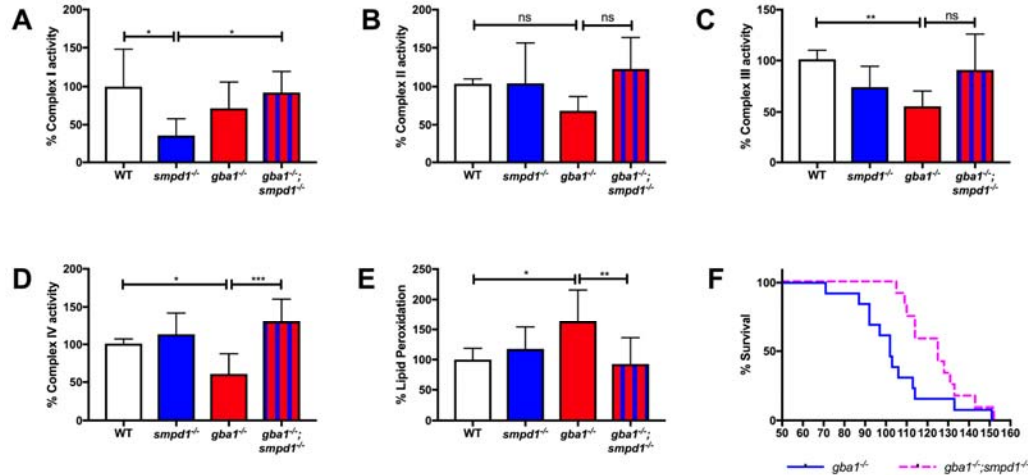

**Fig. 3. Mitochondrial respiratory chain function, lipid peroxidation and survival**

(A) Complex I activity was reduced in *smpd1*<sup>-/-</sup> by 64±34.77% compared to WT (p=0.0198). Complex I activity was normalized in *gba1*<sup>-/-</sup>;*smpd1*<sup>-/-</sup> with an increase by 56±21.9% compared to *smpd1*<sup>-/-</sup> (p=0.0445).

(B) Complex II activity was similar across the different genotypes (p>0.05).

(C) Complex III activity was reduced in *gba1*<sup>-/-</sup> compared to WT by 45%±14.99 (p=0.0091) and increased by 35±35.2% in *gba1*<sup>-/-</sup>;*smpd1*<sup>-/-</sup> compared to *gba1*<sup>-/-</sup> but this did not reach significance (p>0.05).

(D) Complex IV activity was reduced in *gba1*<sup>-/-</sup> by 40%±26.79 compared to WT (p=0.0491), but completely rescued in *gba1*<sup>-/-</sup>;*smpd1*<sup>-/-</sup> double mutants with an increase by 69±26.79% compared to *gba1*<sup>-/-</sup> (p=0.0005).

For all mitochondrial complex activity measurements, 6 brains were used for each genotype.

(E) Lipid peroxidation levels were increased 63±51% in *gba1*<sup>-/-</sup> compared to WT (p=0.0214), but reduced by 71±43.48% compared to *gba1*<sup>-/-</sup> and thus effectively normalised to WT levels in *gba1*<sup>-/-</sup>;*smpd1*<sup>-/-</sup> double mutants (p=0.0094). For lipid peroxidation experiments, n= 6-8 zebrafish bodies were used for each genotype.

Significance in both mitochondrial respiratory chain assays and lipid peroxidation levels was determined by two way ANOVA with Tukey's multiple comparison test

using 12 week brain material. Data represented are the mean  $\pm$ SD. \*\*\* $p < 0.001$ , \*\* $p < 0.01$  and \* $p < 0.05$ .

(F) Survival analysis of *gba1<sup>-/-</sup>;smpd1<sup>-/-</sup>* double-mutant (n=13) compared to *gba1<sup>-/-</sup>* single mutant zebrafish (n=12).  $p = 0.0055$  by Gehan-Breslow-Wilcoxon test.

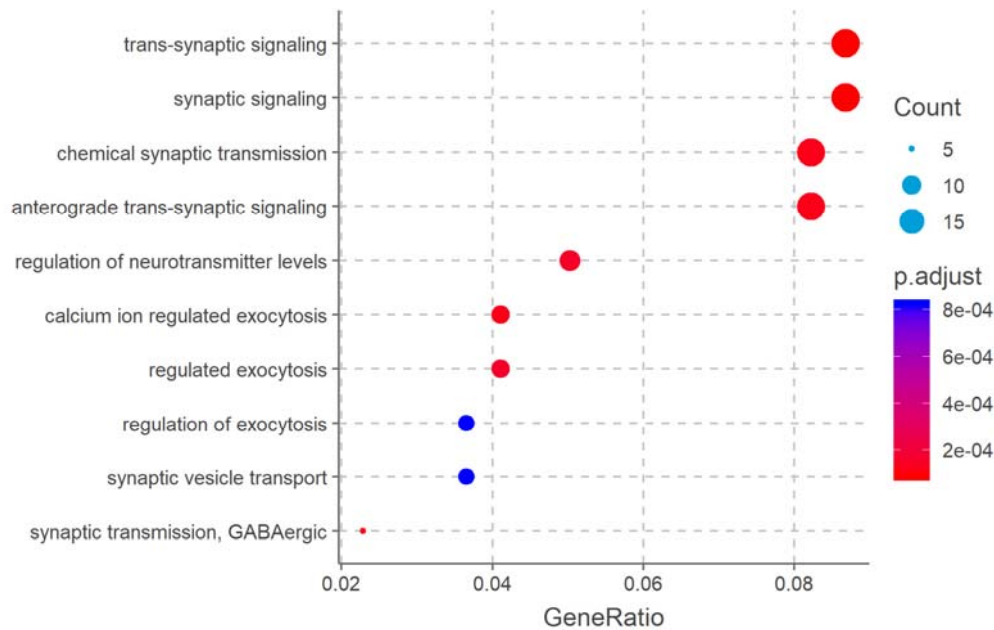

**Figure 5. The Comparative gene ontology analysis indicates marked global impairment of neuronal function in *gba*<sup>-/-</sup> but restoration of neuronal health in *gba1*<sup>-/-</sup>;*smpd1*<sup>-/-</sup>**

A differential expression analysis was first used to identify genes with statistically significant difference between *gba*<sup>-/-</sup> and *gba1*<sup>-/-</sup>;*smpd1*<sup>-/-</sup>. Genes with adjusted p-value < 0.05 and log2 fold-change > 1 or <-1 were used to identify enriched biological processes amongst genes over- and under-expressed in *gba*<sup>-/-</sup>. ClusterProfiler identified significant enriched GO (gene ontology) terms within the gene expression changes which were plotted by GeneRatio (ratio of the differentially expressed genes in one particular GO term to the total number of differentially expressed genes). The lists of over- and under-expressed genes were analysed separately. Shown are the ten GO terms with highest gene ratios amongst under-expressed genes; all relating to key aspects of normal neuronal function and homeostasis. These pathways downregulated in *gba1*<sup>-/-</sup> compared to WT, were normalised in the double mutants. Each GO term is coloured according to the adjusted p-value and ranked according to

gene ratio. The size of the point is then scaled according to the number of differentially-expressed genes in the GO term.



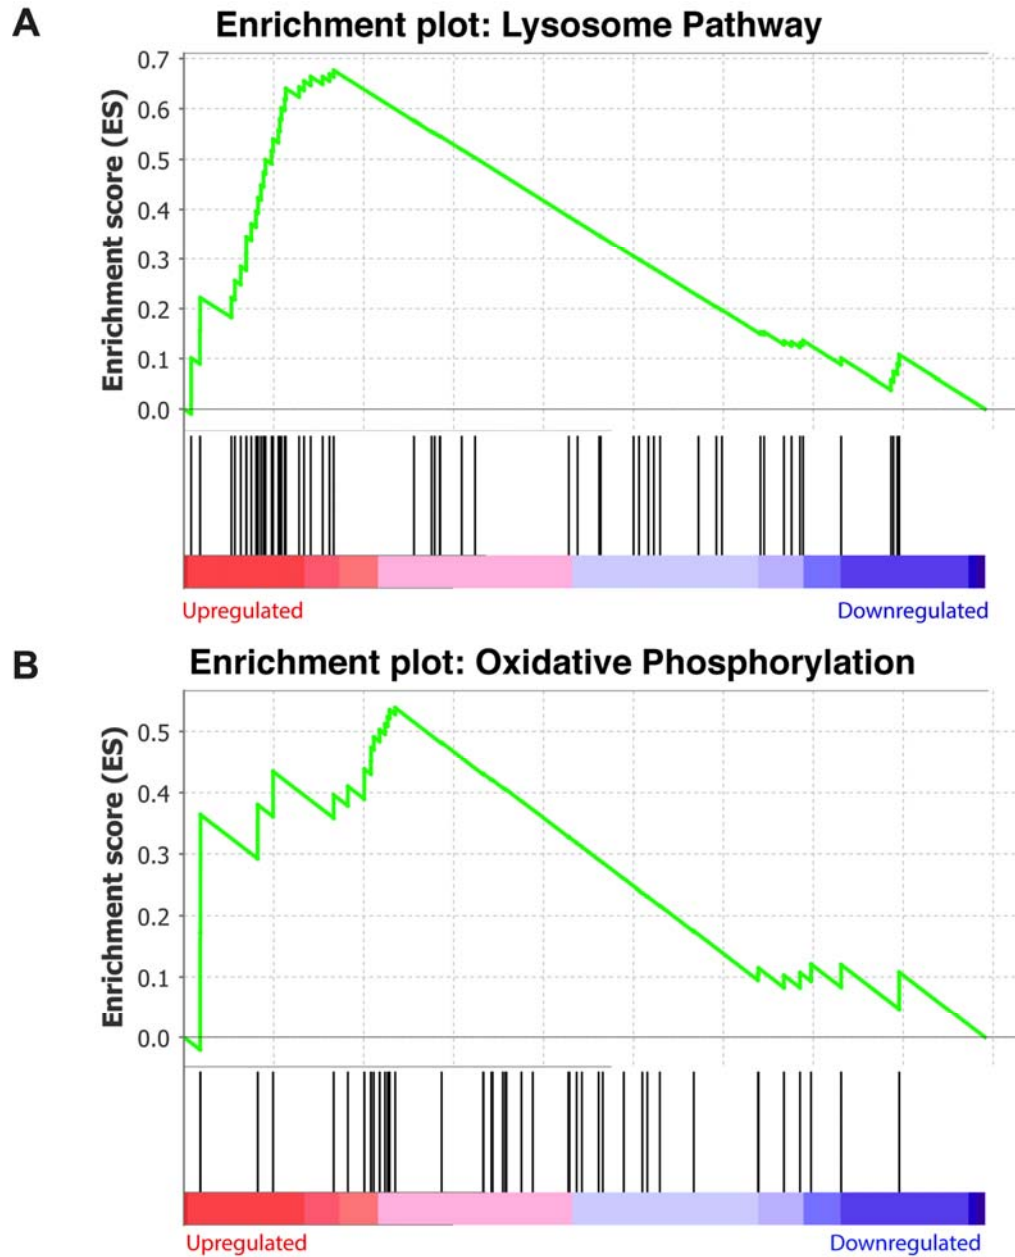

**Figure 6. Lysosomal pathway genes and oxidative phosphorylation pathway genes are upregulated in  $gba^{-/-}$  but normalized in  $gba1^{-/-};smpd1^{-/-}$ .**

The comparison of RNAseq-based transcription levels in the respective pathways between  $gba^{-/-}$  and  $gba1^{-/-};smpd1^{-/-}$  revealed that both A) lysosomal pathway genes and B) oxidative phosphorylation pathway genes were enriched with marked upregulation of both pathways in  $gba1^{-/-}$  compared to wild-type and  $gba1^{-/-};smpd1^{-/-}$ .

The x-axis ranks all differentially expressed genes based on the rank metric score from the most upregulated (left) to the most downregulated (right) for either pathway. The vertical black lines show the location of pathway genes in the entire ranked list from the *gba1*<sup>-/-</sup> expression changes, compared to WT and double mutants. The y-axis is the degree to which a set of pathway genes is overrepresented at the extremes (up or down-regulated) of the entire ranked list of all differentially expressed genes within the genome. A peak in enrichment score (green line) demonstrates an enrichment of pathway genes amongst all over- or under-represented genes. A sharp peak, demonstrates how highly upregulated each pathway is within the *gba1*<sup>-/-</sup> group compared to WT and double mutants.

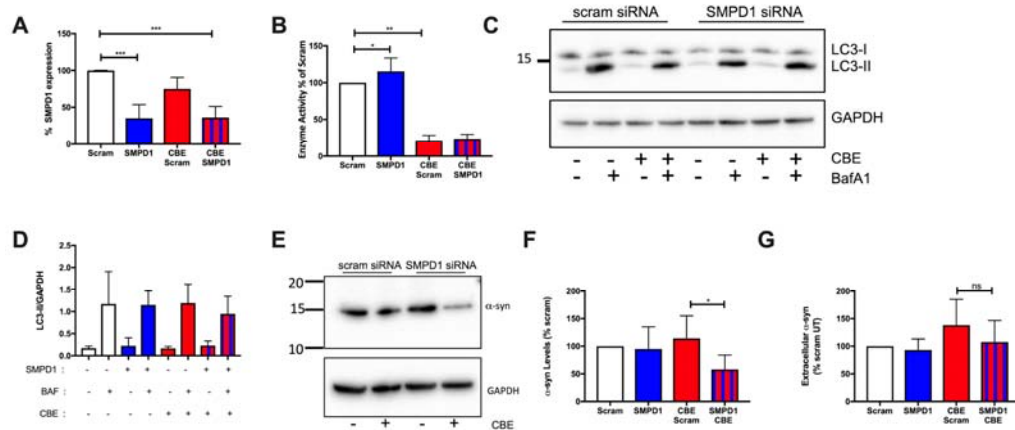

**Fig. 7. Autophagy in combined GCase and ASM deficiency.**

(A) *SMPD1* transcript levels after *SMPD1* knockdown (KD) in untreated (n=4) and CBE treated cells (n=3) respectively compared to untreated controls.

(B) GCase enzyme activity in *SMPD1* KD compared to Scram control (n=7) and in CBE treated groups compared to Scram untreated control (n=7).

(C+D) Macroautophagy flux in *SMPD1* KD cells in the absence and presence of CBE was measured by quantifying LC3-II protein levels using western blotting under basal conditions and following treatment with 100 nM bafilomycin A1 (BafA1). LC3-II protein levels were normalised against GAPDH density and expressed as a ratio, n=3 for all groups.

(E+F) Western blotting for TX-100 soluble  $\alpha$ -synuclein levels in *SMPD1* KD cells in the absence or presence of CBE. Data were normalised against GAPDH density and expressed as % Scram. n = 6 for all groups.

(G) Released  $\alpha$ -synuclein levels in cell culture media from *SMPD1* KD cells in the absence and presence of CBE for the last 24 hours of treatment, assessed by ELISA. Data were normalised against protein concentration of cells and expressed as % Scram; n = 5.

Data represented are the mean  $\pm$ SD, \*\*\*p<0.001, \*\*p<0.01 and \*p<0.05 by two way ANOVA with Tukey's multiple comparison test for all experiments.

### **Video legends:**

All videos were taken when the respective zebrafish were 12 weeks of age.

**V-S1:** Normal swimming behaviour in WT. All adults placed into a novel tank swim to the bottom momentarily before resuming standard swimming, balance and buoyancy maintained.

**V-S2:** Normal swimming behaviour in *smpd<sup>-/-</sup>*. All adults placed into a novel tank swim to the bottom momentarily before resuming standard swimming, balance and buoyancy maintained.

**V-S3:** Markedly abnormal swimming behaviour in *gba<sup>-/-</sup>* with typical “corkscrew” swimming pattern. All adults placed into a novel tank swim in circular motions with balance and buoyancy defects. These increase with frequency and duration at end stage until they need to be culled for humane reasons.

**V-S4:** Normalised swimming behaviour in *gba<sup>-/-</sup>;smpd<sup>-/-</sup>*. All adults placed into a novel tank swim to the bottom momentarily before resuming standard swimming, balance and buoyancy maintained.
